# Supplementary material
Source: PubMed Central journal article supplement (PMC3571414)
Supplement: JVI.03118-12_zjv999097298so1.pdf [file JVI.03118-12_zjv999097298so1.pdf]

**Table S1. Primers used in whole genome amplification for *Zaire ebolavirus* and *Sudan ebolavirus*. All primers are listed 5' to 3'.**

| Species                 | Fragment  | Forward primer          | Reverse primer             | Annealing temperature |
|-------------------------|-----------|-------------------------|----------------------------|-----------------------|
| <i>Zaire ebolavirus</i> | A         | CGGACACACAAAAAGAAAG     | CATCATGTGTCCTACTGATTG      | 45°C                  |
| <i>Zaire ebolavirus</i> | B         | CCAACAACCTTAATAGAAAC    | AATGAGGAGATTGTTTTTGC       | 45°C                  |
| <i>Zaire ebolavirus</i> | C         | CGACATCTTCTGTGATATTG    | AGGAGTTAGAATCACATTGG       | 45°C                  |
| <i>Zaire ebolavirus</i> | D         | CAGGGGGACAATGACAATTG    | CCCCTTCGAGTTAAAATAGCC      | 50°C                  |
| <i>Zaire ebolavirus</i> | E         | GGTCTGATCTCTGATTGGCT    | GCCAATGATGCATGGAAGAA       | 49°C                  |
| <i>Zaire ebolavirus</i> | F         | CAGCTGACTTCGAAGACGAA    | CACAAAGATTAAGGCTATCACCG    | 48°C                  |
| <i>Zaire ebolavirus</i> | G         | CACTCAGCACTTAGCACATC    | GGACACACAAAAAGAAGAA        | 45°C                  |
| <i>Sudan ebolavirus</i> | A         | CGGACACACAAAAAGAAAGA    | GGGATATCAGTAGATACTCC       | 54°C                  |
| <i>Sudan ebolavirus</i> | A1        | GGACACACAAAAAGAAAGAAAAG | AGCATATTGTTGGAGTTGCTT      | 50°C                  |
| <i>Sudan ebolavirus</i> | A2        | TTGCCAGTTTGTCTTCTACCC   | TGGAAAAGGAACTGAGGCG        | 50°C                  |
| <i>Sudan ebolavirus</i> | B         | TGGGTGTTGTGACTAACAGC    | GAGATGAAAATTGGCAGAGC       | 56°C                  |
| <i>Sudan ebolavirus</i> | C         | ACCCATGGACACACTCTAGC    | AAGTCTCATCAGGCTTGAGG       | 58°C                  |
| <i>Sudan ebolavirus</i> | C(nested) | ACTTGAGTTTGATGTCAACC    | ATGATAATCGGCCGCAATGC       | 54°C                  |
| <i>Sudan ebolavirus</i> | D         | AAGTGATGATTTTCGGAGAGC   | TTTCTTCAGGAGAAGGTTTCG      | 56°C                  |
| <i>Sudan ebolavirus</i> | D(nested) | TGATTTTCGGACCATTGCAC    | GATATGTGGAGCTGTTGTCG       | 58°C                  |
| <i>Sudan ebolavirus</i> | E         | CAACAGATCCCATTAGCAGC    | TGGACACACAAAAAGAGAAAATACAG | 56°C                  |

Table S2. Filoviruses examined in this study, including sample names, virus harvest identification numbers, countries of origin, collection dates, and GenBank accession numbers. Sequences that were generated for this study (and are newly reported) are marked by asterisks.

| <b>Species</b>           | <b>Sample Name</b>                | <b>VirHarv#</b> | <b>Country</b>               | <b>Date</b> | <b>GenBank</b> |   |
|--------------------------|-----------------------------------|-----------------|------------------------------|-------------|----------------|---|
| <i>Zaire ebolavirus</i>  | deRoover                          | 800495          | Democratic Republic of Congo | 1976        | KC242801       | * |
| <i>Zaire ebolavirus</i>  | Mayinga                           | n/a             | Democratic Republic of Congo | 1976        | AF086833       |   |
| <i>Zaire ebolavirus</i>  | Bonduni                           | 802606          | Democratic Republic of Congo | 1977        | KC242791       | * |
| <i>Zaire ebolavirus</i>  | Kikwit                            | n/a             | Democratic Republic of Congo | 1995        | AY354458       |   |
| <i>Zaire ebolavirus</i>  | 13625 Kikwit                      | 807232          | Democratic Republic of Congo | 1995        | KC242796       | * |
| <i>Zaire ebolavirus</i>  | 13709 Kikwit                      | 809066          | Democratic Republic of Congo | 1995        | KC242799       | * |
| <i>Zaire ebolavirus</i>  | M-M Luebo                         | n/a             | Democratic Republic of Congo | 2007        | HQ613403       |   |
| <i>Zaire ebolavirus</i>  | 0 Luebo                           | 811220          | Democratic Republic of Congo | 2007        | KC242785       | * |
| <i>Zaire ebolavirus</i>  | 1 Luebo                           | 811221          | Democratic Republic of Congo | 2007        | KC242786       | * |
| <i>Zaire ebolavirus</i>  | 4 Luebo                           | 811244          | Democratic Republic of Congo | 2007        | KC242789       | * |
| <i>Zaire ebolavirus</i>  | 5 Luebo                           | 811245          | Democratic Republic of Congo | 2007        | KC242790       | * |
| <i>Zaire ebolavirus</i>  | 9 Luebo                           | 811219          | Democratic Republic of Congo | 2007        | KC242784       | * |
| <i>Zaire ebolavirus</i>  | 23 Luebo                          | 811223          | Democratic Republic of Congo | 2007        | KC242787       | * |
| <i>Zaire ebolavirus</i>  | 43 Luebo                          | 811243          | Democratic Republic of Congo | 2007        | KC242788       | * |
| <i>Zaire ebolavirus</i>  | 034-KS Luebo                      | n/a             | Democratic Republic of Congo | 2008        | HQ613402       |   |
| <i>Zaire ebolavirus</i>  | Gabon                             | 807460          | Gabon                        | 1994        | KC242792       | * |
| <i>Zaire ebolavirus</i>  | 1Eko                              | 807465          | Gabon                        | 1996        | KC242793       | * |
| <i>Zaire ebolavirus</i>  | 1Mbie                             | 807464          | Gabon                        | 1996        | KC242795       | * |
| <i>Zaire ebolavirus</i>  | 1Oba                              | 807466          | Gabon                        | 1996        | KC242797       | * |
| <i>Zaire ebolavirus</i>  | 2Ikot                             | 807481          | Gabon                        | 1996        | KC242798       | * |
| <i>Zaire ebolavirus</i>  | 2Nza                              | 807476          | Gabon                        | 1996        | KC242794       | * |
| <i>Zaire ebolavirus</i>  | Ilembe                            | 809085          | Gabon                        | 2002        | KC242800       | * |
| <i>Sudan ebolavirus</i>  | Boneface                          | n/a             | Sudan                        | 1976        | FJ968794       |   |
| <i>Sudan ebolavirus</i>  | Maleo                             | 808029          | Sudan                        | 1979        | KC242783       | * |
| <i>Sudan ebolavirus</i>  | Yambio                            | n/a             | Sudan                        | 2004        | EU338380       |   |
| <i>Sudan ebolavirus</i>  | Gulu                              | n/a             | Uganda                       | 2000        | AY729654       |   |
| <i>Sudan ebolavirus</i>  | Nakisamata                        | 811836          | Uganda                       | 2011        | JN638998       |   |
| <i>Reston ebolavirus</i> | Ferlite, Philippines/Pennsylvania | n/a             | Philippines/USA              | 1989        | AF522874       |   |
| <i>Reston ebolavirus</i> | Ferlite, Philippines/Alice, TX    | 807334          | Philippines/USA              | 1996        | JX477166       | * |
| <i>Reston ebolavirus</i> | Ferlite                           | n/a             | Philippines                  | 1996        | AB050936       |   |
| <i>Reston ebolavirus</i> | 08A Farm A                        | 811413          | Philippines                  | 2008        | FJ621583       |   |

|                              |             |        |                              |      |          |   |
|------------------------------|-------------|--------|------------------------------|------|----------|---|
| <i>Reston ebolavirus</i>     | 08C Farm CE | n/a    | Philippines                  | 2008 | FJ621584 |   |
| <i>Reston ebolavirus</i>     | 08E Farm CE | 811416 | Philippines                  | 2008 | FJ621585 |   |
| <i>Reston ebolavirus</i>     | 09A Farm A  | 811462 | Philippines                  | 2009 | JX477165 | * |
| <i>Tai Forest ebolavirus</i> | Tai Forest  | n/a    | Côte d'Ivoire                | 1994 | FJ217162 |   |
| <i>Bundibugyo ebolavirus</i> | Bundibugyo  | 811250 | Uganda                       | 2007 | FJ217161 |   |
| <i>Marburg marburgvirus</i>  | 0126        | n/a    | Angola                       | 2005 | DQ447656 |   |
| <i>Marburg marburgvirus</i>  | 0181        | n/a    | Angola                       | 2005 | DQ447653 |   |
| <i>Marburg marburgvirus</i>  | 0214        | n/a    | Angola                       | 2005 | DQ447657 |   |
| <i>Marburg marburgvirus</i>  | 0215        | n/a    | Angola                       | 2005 | DQ447658 |   |
| <i>Marburg marburgvirus</i>  | 0754        | n/a    | Angola                       | 2005 | DQ447659 |   |
| <i>Marburg marburgvirus</i>  | 0998        | n/a    | Angola                       | 2005 | DQ447660 |   |
| <i>Marburg marburgvirus</i>  | 1379c       | 810812 | Angola                       | 2005 | DQ447653 |   |
| <i>Marburg marburgvirus</i>  | 1380        | 810813 | Angola                       | 2005 | DQ447653 |   |
| <i>Marburg marburgvirus</i>  | 1381        | 810814 | Angola                       | 2005 | DQ447654 |   |
| <i>Marburg marburgvirus</i>  | 1386        | 810816 | Angola                       | 2005 | DQ447655 |   |
| <i>Marburg marburgvirus</i>  | 1411        | 810834 | Angola                       | 2005 | DQ447653 |   |
| <i>Marburg marburgvirus</i>  | 01 DRC      | 810996 | Democratic Republic of Congo | 1999 | JX458833 | * |
| <i>Marburg marburgvirus</i>  | 02 DRC      | 810997 | Democratic Republic of Congo | 1999 | JX458851 | * |
| <i>Marburg marburgvirus</i>  | 03 DRC      | 810999 | Democratic Republic of Congo | 1999 | JX458826 | * |
| <i>Marburg marburgvirus</i>  | 04 DRC      | 810998 | Democratic Republic of Congo | 1999 | JX458825 | * |
| <i>Marburg marburgvirus</i>  | 05 DRC      | 811001 | Democratic Republic of Congo | 1999 | DQ447651 |   |
| <i>Marburg marburgvirus</i>  | 06 DRC      | 811002 | Democratic Republic of Congo | 1999 | JX458830 | * |
| <i>Marburg marburgvirus</i>  | 07 DRC      | 811004 | Democratic Republic of Congo | 1999 | DQ447650 |   |
| <i>Marburg marburgvirus</i>  | 09 DRC      | 808614 | Democratic Republic of Congo | 1999 | DQ447652 |   |
| <i>Marburg marburgvirus</i>  | 12 DRC      | 811006 | Democratic Republic of Congo | 2000 | JX458840 | * |
| <i>Marburg marburgvirus</i>  | 13 DRC      | 811008 | Democratic Republic of Congo | 2000 | JX458845 | * |
| <i>Marburg marburgvirus</i>  | 14 DRC      | 811011 | Democratic Republic of Congo | 2000 | JX458831 | * |
| <i>Marburg marburgvirus</i>  | 15 DRC      | 811007 | Democratic Republic of Congo | 2000 | JX458847 | * |
| <i>Marburg marburgvirus</i>  | 16 DRC      | 811009 | Democratic Republic of Congo | 2000 | JX458839 | * |
| <i>Marburg marburgvirus</i>  | 17 DRC      | 811010 | Democratic Republic of Congo | 2000 | JX458838 | * |
| <i>Marburg marburgvirus</i>  | 18 DRC      | 811012 | Democratic Republic of Congo | 2000 | JX458842 | * |
| <i>Marburg marburgvirus</i>  | 19 DRC      | 811013 | Democratic Republic of Congo | 2000 | JX458828 | * |
| <i>Marburg marburgvirus</i>  | 20 DRC      | 811014 | Democratic Republic of Congo | 2000 | JX458841 | * |
| <i>Marburg marburgvirus</i>  | 21 DRC      | 811015 | Democratic Republic of Congo | 2000 | JX458843 | * |
| <i>Marburg marburgvirus</i>  | 22 DRC      | 811016 | Democratic Republic of Congo | 2000 | JX458848 | * |

|                             |           |        |                              |      |          |   |
|-----------------------------|-----------|--------|------------------------------|------|----------|---|
| <i>Marburg marburgvirus</i> | 23 DRC    | 811018 | Democratic Republic of Congo | 2000 | JX458835 | * |
| <i>Marburg marburgvirus</i> | 24 DRC    | 811017 | Democratic Republic of Congo | 2000 | JX458834 | * |
| <i>Marburg marburgvirus</i> | 25 DRC    | 811019 | Democratic Republic of Congo | 2000 | JX458849 | * |
| <i>Marburg marburgvirus</i> | 26 DRC    | 811020 | Democratic Republic of Congo | 2000 | JX458844 | * |
| <i>Marburg marburgvirus</i> | 27 DRC    | 811021 | Democratic Republic of Congo | 2000 | JX458837 | * |
| <i>Marburg marburgvirus</i> | 28 DRC    | 811022 | Democratic Republic of Congo | 2000 | JX458846 | * |
| <i>Marburg marburgvirus</i> | 29 DRC    | 811023 | Democratic Republic of Congo | 2000 | JX458836 | * |
| <i>Marburg marburgvirus</i> | 30 DRC    | 811024 | Democratic Republic of Congo | 2000 | JX458832 | * |
| <i>Marburg marburgvirus</i> | 32 DRC    | 811025 | Democratic Republic of Congo | 2000 | JX458827 | * |
| <i>Marburg marburgvirus</i> | 33 DRC    | 811026 | Democratic Republic of Congo | 2000 | JX458850 | * |
| <i>Marburg marburgvirus</i> | 34 DRC    | 811027 | Democratic Republic of Congo | 2000 | JX458829 | * |
| <i>Marburg marburgvirus</i> | Musoke    | 802094 | Kenya                        | 1980 | DQ217792 |   |
| <i>Marburg marburgvirus</i> | Ravn      | 810040 | Kenya                        | 1987 | DQ447649 |   |
| <i>Marburg marburgvirus</i> | Popp      | n/a    | Uganda/Germany               | 1967 | Z29337   |   |
| <i>Marburg marburgvirus</i> | Leiden    | n/a    | Uganda/Netherlands           | 2008 | JN408064 |   |
| <i>Marburg marburgvirus</i> | 44 Bat    | 811274 | Uganda                       | 2007 | FJ750954 |   |
| <i>Marburg marburgvirus</i> | 188 Bat   | 811275 | Uganda                       | 2007 | FJ750955 |   |
| <i>Marburg marburgvirus</i> | 331 Bat   | 811276 | Uganda                       | 2007 | FJ750959 |   |
| <i>Marburg marburgvirus</i> | 371 Bat   | 811277 | Uganda                       | 2007 | FJ750958 |   |
| <i>Marburg marburgvirus</i> | 01 Uga    | 811210 | Uganda                       | 2007 | FJ750957 |   |
| <i>Marburg marburgvirus</i> | 02 Uga    | 811224 | Uganda                       | 2007 | FJ750953 |   |
| <i>Marburg marburgvirus</i> | 982 Bat   | 811391 | Uganda                       | 2008 | FJ750956 |   |
| <i>Marburg marburgvirus</i> | 53 QBat   | 811471 | Uganda                       | 2008 | JX458852 | * |
| <i>Marburg marburgvirus</i> | 164 QBat  | 811472 | Uganda                       | 2008 | JX458853 | * |
| <i>Marburg marburgvirus</i> | 843 QBat  | 811600 | Uganda                       | 2009 | JX458855 | * |
| <i>Marburg marburgvirus</i> | 914 QBat  | 811601 | Uganda                       | 2009 | JX458856 | * |
| <i>Marburg marburgvirus</i> | 1175 QBat | 811602 | Uganda                       | 2009 | JX458854 | * |
| <i>Marburg marburgvirus</i> | 1304 QBat | 811673 | Uganda                       | 2009 | JX458857 | * |
| <i>Marburg marburgvirus</i> | 1328 QBat | 811674 | Uganda                       | 2009 | JX458858 | * |
| <i>Marburg marburgvirus</i> | Ozolins   | 808143 | Zimbabwe                     | 1975 | AY358025 |   |
| Lloviu virus                | Lloviu    | n/a    | Spain                        | 2003 | JF828358 |   |
